# Supplementary material for: Surface properties of ceria synthesised using Triton-X based reverse microemulsions
Source: Royal Society of Chemistry journal article supplement (doi:10.1039/c8ra08947g), 2019-01-01
Supplement: c8ra08947g1.pdf [file c8ra08947g1.pdf]

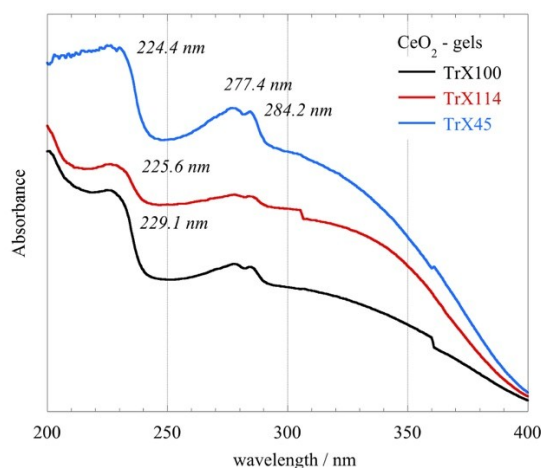

**Figure S4:** UV-Vis Absorption spectra of the three different ceria gels corresponding to Triton X-100, Triton X-114 and Triton X-45.

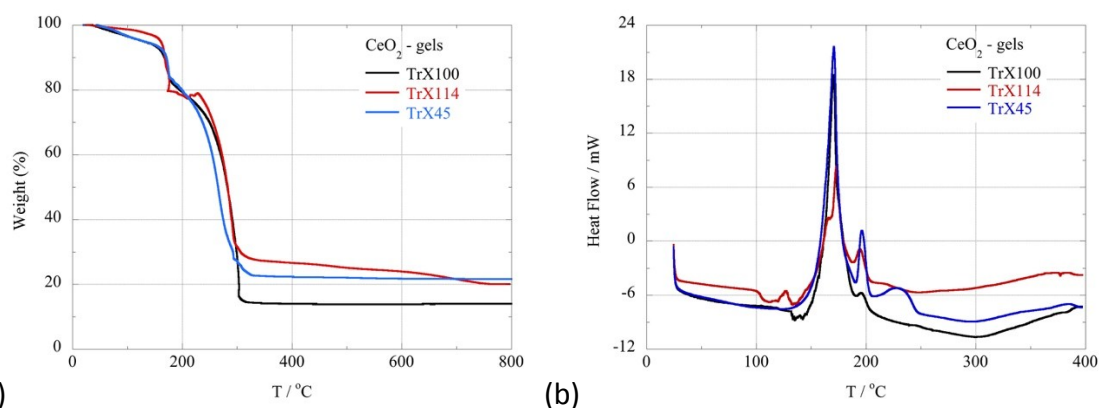

**Figure S5:** (a) TGA and (b) DSC profiles of the three different ceria gels corresponding to Triton X-100, Triton X-114 and Triton X-45 reverse micelles.

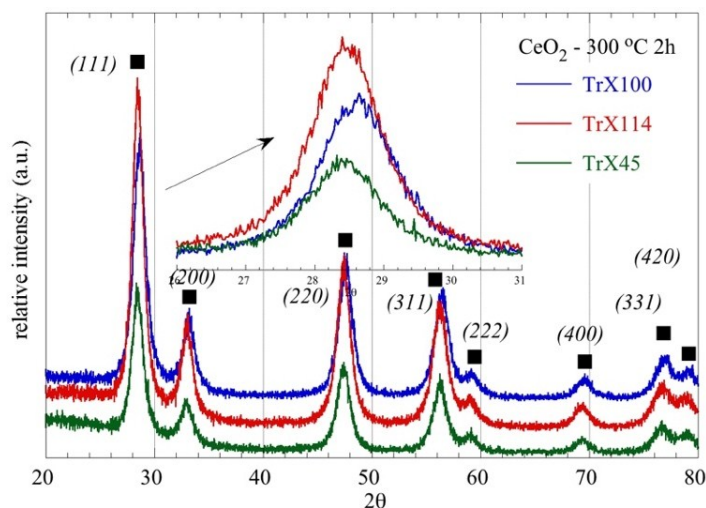

**Figure S6:** X-Ray Diffractograms of the ceria solids corresponding to the three different Triton-X reverse micelles after calcination at 300 °C for 2 h.

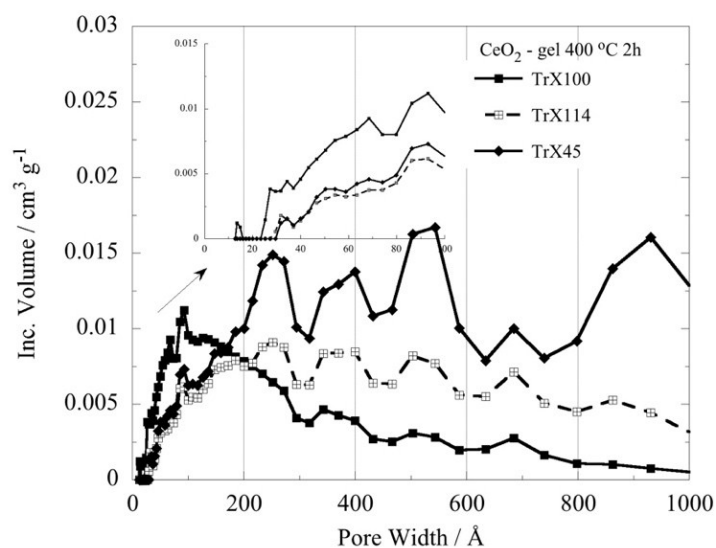

**Figure S7:** DFT pore size distributions of the ceria solids obtained from the three different Triton-X surfactants gels after calcination at 400 °C for 2 h.

**Table S1:** FTIR-ATR data of the  $Ce(O^iPr)_4$  precursor compound.<sup>19-24</sup>

| functional group                                                            | bibliographical characteristic absorption (cm <sup>-1</sup> ) | experimental characteristic absorption (cm <sup>-1</sup> ) |
|-----------------------------------------------------------------------------|---------------------------------------------------------------|------------------------------------------------------------|
| stretching vibration of hydroxyl groups                                     | 3500                                                          | 3330                                                       |
| -C-H elongation vibration                                                   | 2968                                                          | 2966                                                       |
| anti-symmetric stretching vibration of -C-H                                 | 2930                                                          | 2923                                                       |
| symmetric stretching vibration of -C-H                                      | 2868                                                          | 2852                                                       |
| bending vibration of -OH                                                    | 1600                                                          | 1633                                                       |
| bending vibration of -C-H                                                   | 1480                                                          | 1462                                                       |
| CH <sub>3</sub> -C-CH <sub>3</sub> stretching modes of the isopropoxy group | 1350                                                          | 1360                                                       |
| stretching conjugated vibration of -C-O                                     | 1050                                                          | 1041                                                       |
| C-C stretching vibration within the isopropoxy group                        | < 1000                                                        | 835                                                        |
| skeletal vibration of the isopropoxy group                                  | 841                                                           | 820                                                        |
| symmetrical skeletal vibration of the isopropoxy group                      | 785                                                           | 727                                                        |
| skeletal vibration of the isopropoxy group                                  | 566                                                           | 550                                                        |
| stretching vibration of Ce-OR                                               | 406                                                           | 407                                                        |

**Table S2:**  $^1\text{H}$  και  $^{13}\text{C}$  NMR (ppm) experimental data of  $\text{Ce}(\text{O}^i\text{Pr})_4$  in  $\text{CDCl}_3$  solvent.<sup>25</sup>

| $^1\text{H}$ NMR                                                 |                                                 | $^{13}\text{C}$ NMR |                                     |
|------------------------------------------------------------------|-------------------------------------------------|---------------------|-------------------------------------|
| $\delta$ (ppm)                                                   | compound                                        | $\delta$ (ppm)      | compound                            |
| (1.201 & 1.213)<br>doublet, 24 H                                 | isopropoxide ( $\text{CH}_3$ )                  | 25.35, 8 C          | isopropoxide ( $\text{CH}_3$ )      |
| 1.423 single                                                     | water (OH)                                      | 59.06               | DME ( $\text{CH}_3$ )               |
| 3.392 single                                                     | DME ( $\text{CH}_3$ )                           | 64.43, 4 C          | isopropoxide (CH)                   |
| 3.542 single                                                     | DME ( $\text{CH}_2$ )                           | 71.8                | DME ( $\text{CH}_2$ )               |
| (3.988, 4, 4.012,<br>4.025, 4.037, 4.049 &<br>4.061) septet, 4 H | isopropoxide (CH)                               | (76.74, 77 & 77.25) | solvent ( $\text{CDCl}_3$ ) signals |
| 7.26                                                             | solvent ( $\text{CDCl}_3$ )<br>residual signals |                     |                                     |

**Table S3:** TGA and DSC data of the three different ceria gels corresponding to Triton X-100, Triton X-114 and Triton X-45 reverse microemulsions.

| TGA - sample - $\text{CeO}_2$ | temperature range ( $^\circ\text{C}$ ) | weight loss (%)* |
|-------------------------------|----------------------------------------|------------------|
| gel Triton X-100              | 34.1 - 143.3                           | 7.58             |
|                               | 145 - 187.6                            | 17.96            |
|                               | 192.8 - 320.7                          | 91.02            |
|                               | 324.1 - 385.5                          | 1.2              |
| gel Triton X-114              | 30.7 - 127.9                           | 2.7              |
|                               | 131.3 - 179.1                          | 23.89            |
|                               | 182.5 - 325.8                          | 68.98            |
|                               | 329.2 - 586.8                          | 5.01             |
| gel Triton X-45               | 598.7 - 765.9                          | 5.4              |
|                               | 40.9 - 131.3                           | 5.05             |
|                               | 133.1 - 179.1                          | 11.3             |
|                               | 179.1 - 327.5                          | 62.44            |
|                               | 358.2 - 557.8                          | 1.19             |

\* The weight loss values are normalized.

| DSC - sample - $\text{CeO}_2$ | temperature range ( $^\circ\text{C}$ ) | max peak temperature ( $^\circ\text{C}$ ) | enthalpy (J/g) | combustion total enthalpy (J/g) |
|-------------------------------|----------------------------------------|-------------------------------------------|----------------|---------------------------------|
| gel Triton X-100              | 130.9 - 140.5                          | 133.2                                     | endo: 2.7      | exo: 414.8                      |
|                               | 142.9 - 190.6                          | 170.5                                     | exo: 326       |                                 |
|                               | 191.8 - 206.7                          | 196.4                                     | exo: 5.4       |                                 |
|                               | 265.1 - 333.1                          | 302.3                                     | endo: 32.4     |                                 |
| gel Triton X-114              | 97.5 - 127.4                           | 111.7                                     | endo: 22.5     | exo: 304.9                      |
|                               | 135.1 - 187.6                          | 173                                       | exo: 174.9     |                                 |
|                               | 188.8 - 206.1                          | 195.2                                     | exo: 15.9      |                                 |
|                               | 215.6 - 274.7                          | 243.2                                     | endo: 20       |                                 |
| gel Triton X-45               | 318.8 - 392.7                          | 363.1                                     | exo: 25.4      | exo: 515.3                      |
|                               | 129.7 - 189.4                          | 170.8                                     | exo: 389.4     |                                 |
|                               | 190.6 - 206.1                          | 196.3                                     | exo: 44.4      |                                 |
|                               | 208.5 - 247.8                          | 231.1                                     | exo: 48.4      |                                 |
|                               | 256.8 - 341.4                          | 297.9                                     | endo: 47       |                                 |
|                               | 357 - 393.3                            | 383.5                                     | exo: 7.6       |                                 |

**Table S4:** *Experimental and literature FTIR data for the CeO<sub>2</sub> solids obtained from the three different Triton-X reversed micelles.*<sup>2,33,35-42</sup>

| functional group                                                                                                          | bibliographical characteristic absorption (cm <sup>-1</sup> ) | experimental characteristic absorption (cm <sup>-1</sup> ) |
|---------------------------------------------------------------------------------------------------------------------------|---------------------------------------------------------------|------------------------------------------------------------|
| stretching vibration of physisorbed H <sub>2</sub> O or OH <sup>-</sup> stretching frequency of unidentate Ce-OH          | 3440                                                          | 3437                                                       |
| asymmetric stretch of CO <sub>2</sub>                                                                                     | 2350                                                          | 2353                                                       |
| stretching vibration of the hydrogen bonded C=O group                                                                     | 1783                                                          | 1769                                                       |
| bending vibration of -OH <sup>-</sup>                                                                                     | 1620                                                          | 1640                                                       |
| asymmetric stretching vibration of C-O-C at para-disub phenol or asymmetric stretching vibration of the RCOO <sup>-</sup> | 1540                                                          | 1548                                                       |
| stretching vibration of COO & Ce-O-C or Ce-O-Ce                                                                           | 1380                                                          | 1391                                                       |
| stretching vibration of Ce-O                                                                                              | 850                                                           | 835                                                        |
| stretching vibration of the Ce-O-Ce                                                                                       | 710                                                           | 671                                                        |
| stretching vibration of the Ce-O                                                                                          | 500                                                           | 500                                                        |
| δ(Ce-O...O) stretching mode of vibration                                                                                  | 534, 526 & 497                                                | 500-400                                                    |
